# Supplementary material for: Dietary Iron Supplementation Alters Hepatic Inflammation in a Rat Model of Nonalcoholic Steatohepatitis
Source: PubMed Central journal article supplement (PMC5852751; doi:10.3390/nu10020175), 2018-02-04
Supplement: nutrients-10-00175-s001.pdf [file nutrients-10-00175-s001.pdf]

**Figure S1.** Temporal changes in this model

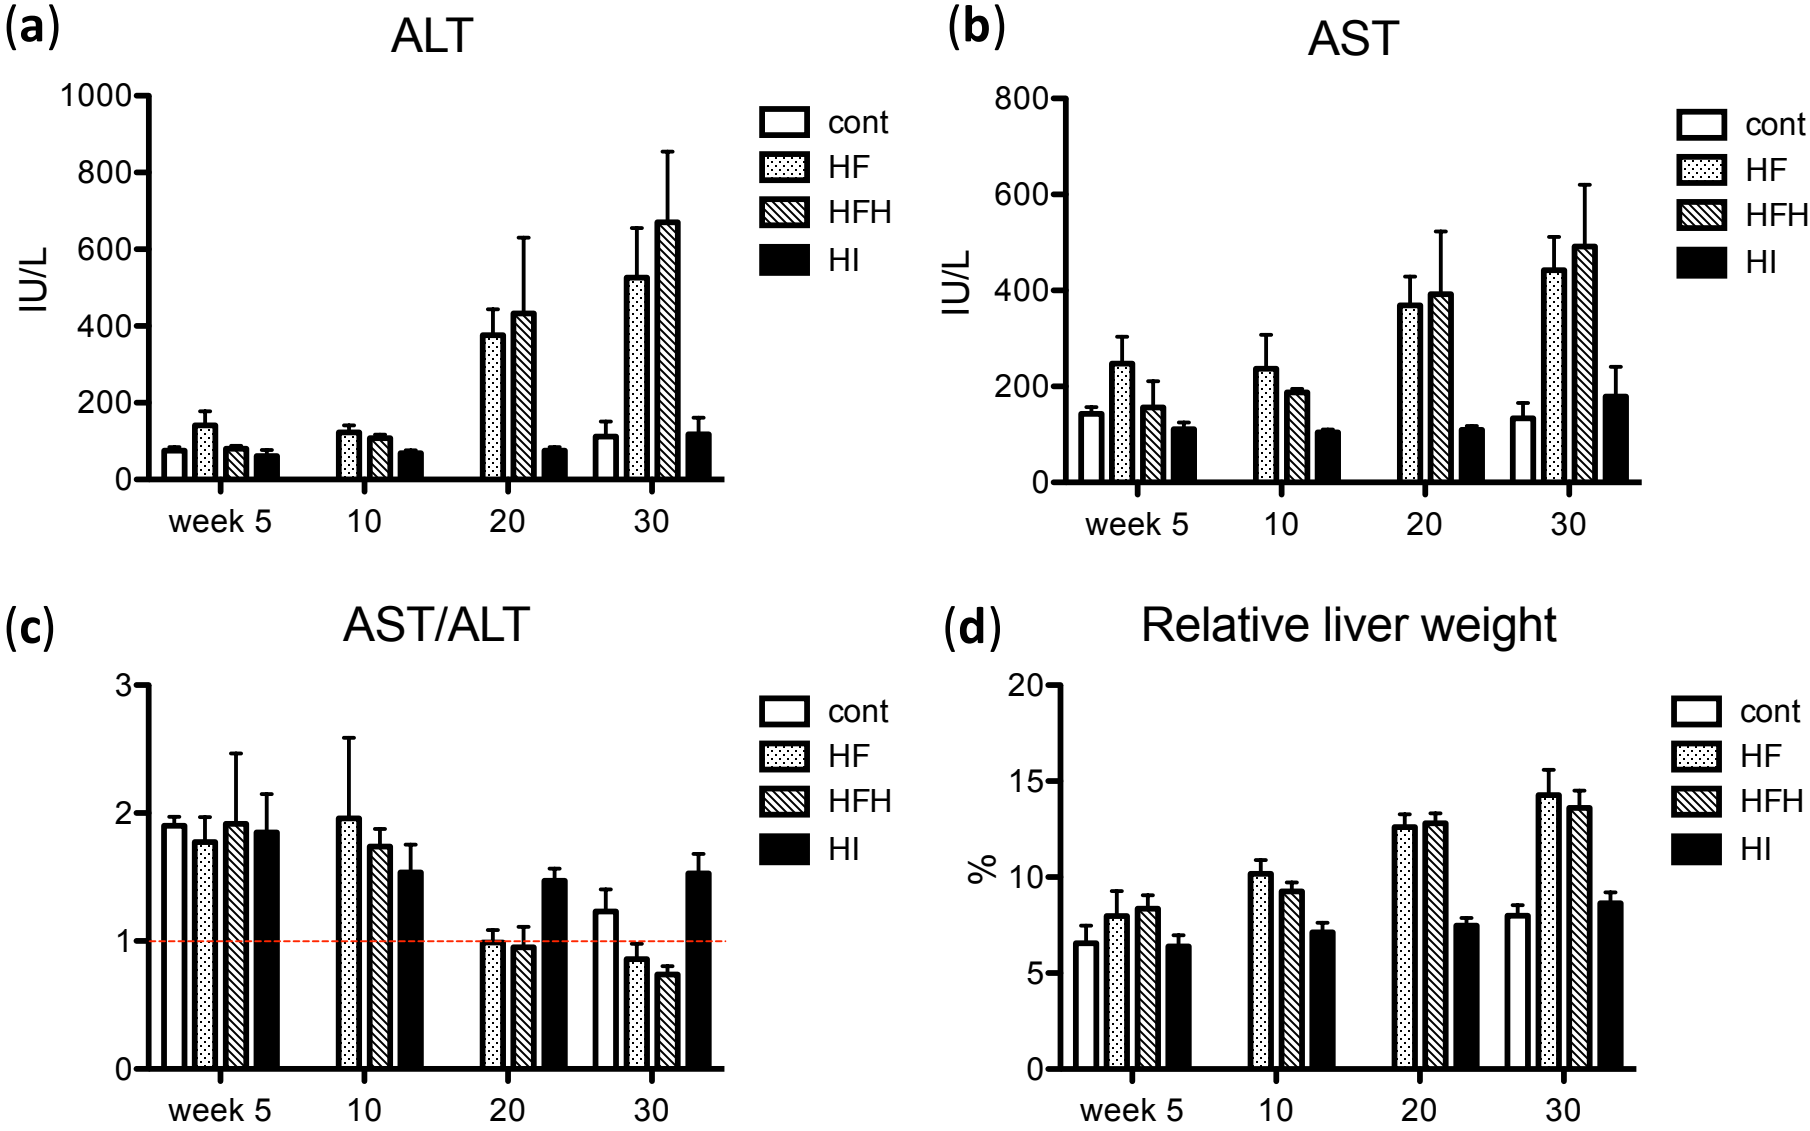

**Figure S1.** Temporal changes of (a) ALT, (b) AST, (c) ratio of AST/ALT and (d) relative liver weight. The red dashed line in (c) indicates value 1 of AST/ALT ratio.
